# Supplementary material for: Lysyl Oxidase Is Downregulated by the EWS/FLI1 Oncoprotein and Its Propeptide Domain Displays Tumor Supressor Activities in Ewing Sarcoma Cells
Source: PubMed Central journal article supplement (PMC3672102; doi:10.1371/journal.pone.0066281), 2013-06-04
Supplement: pone.0066281.s003.pdf [file pone.0066281.s003.pdf]

**Table S1. Summary report of gene sets derived from the Reactome pathway database enrichment in A673 cells upon LOX-PP expression.**

|    | GENE SET (follow link to MSigDB)                                               | SIZE | ES   | NES  | NOM p-val | FDR q-val | FWER p-val | RANK AT MAX |
|----|--------------------------------------------------------------------------------|------|------|------|-----------|-----------|------------|-------------|
| 1  | <a href="#">REACTOME CHOLESTEROL BIOSYNTHESIS</a>                              | 22   | 0,84 | 2,83 | 0         | 0         | 0          | 3974        |
| 2  | <a href="#">REACTOME DNA STRAND ELONGATION</a>                                 | 30   | 0,68 | 2,45 | 0         | 0         | 0          | 4974        |
| 3  | <a href="#">REACTOME MITOTIC PROMETAPHASE</a>                                  | 86   | 0,54 | 2,42 | 0         | 0         | 0          | 4434        |
| 4  | <a href="#">REACTOME EXTENSION OF TELOMERES</a>                                | 27   | 0,66 | 2,3  | 0         | 0,002     | 0,003      | 3955        |
| 5  | <a href="#">REACTOME E2F MEDIATED REGULATION OF DNA REPLICATION</a>            | 33   | 0,64 | 2,29 | 0         | 0,001     | 0,003      | 4168        |
| 6  | <a href="#">REACTOME COLLAGEN FORMATION</a>                                    | 58   | 0,57 | 2,29 | 0         | 0,001     | 0,003      | 2809        |
| 7  | <a href="#">REACTOME LAGGING STRAND SYNTHESIS</a>                              | 19   | 0,72 | 2,27 | 0         | 0,001     | 0,004      | 4722        |
| 8  | <a href="#">REACTOME DNA REPLICATION</a>                                       | 188  | 0,46 | 2,27 | 0         | 0,001     | 0,004      | 4974        |
| 9  | <a href="#">REACTOME G2 M CHECKPOINTS</a>                                      | 41   | 0,59 | 2,23 | 0         | 0,002     | 0,007      | 5346        |
| 10 | <a href="#">REACTOME EXTRACELLULAR MATRIX ORGANIZATION</a>                     | 87   | 0,49 | 2,2  | 0         | 0,001     | 0,007      | 2809        |
| 11 | <a href="#">REACTOME ACTIVATION OF ATR IN RESPONSE TO REPLICATION STRESS</a>   | 35   | 0,58 | 2,17 | 0         | 0,002     | 0,012      | 5346        |
| 12 | <a href="#">REACTOME CITRIC ACID CYCLE TCA CYCLE</a>                           | 19   | 0,69 | 2,17 | 0         | 0,002     | 0,014      | 3904        |
| 13 | <a href="#">REACTOME CELL CYCLE MITOTIC</a>                                    | 308  | 0,41 | 2,15 | 0         | 0,003     | 0,016      | 4974        |
| 14 | <a href="#">REACTOME MITOTIC M M G1 PHASES</a>                                 | 168  | 0,44 | 2,14 | 0         | 0,003     | 0,018      | 5316        |
| 15 | <a href="#">REACTOME FATTY ACID TRIACYLGLYCEROL AND KETONE BODY METABOLISM</a> | 167  | 0,42 | 2,11 | 0         | 0,004     | 0,029      | 3626        |
| 16 | <a href="#">REACTOME CYCLIN A B1 ASSOCIATED EVENTS DURING G2 M TRANSITION</a>  | 15   | 0,7  | 2,1  | 0,003     | 0,005     | 0,036      | 5416        |
| 17 | <a href="#">REACTOME DNA REPAIR</a>                                            | 101  | 0,46 | 2,1  | 0         | 0,004     | 0,036      | 5508        |
| 18 | <a href="#">REACTOME GLOBAL GENOMIC NER GG NER</a>                             | 31   | 0,58 | 2,07 | 0         | 0,005     | 0,045      | 6189        |
| 19 | <a href="#">REACTOME PROCESSION SYNTHESIS ON THE LAGGING STRAND</a>            | 15   | 0,71 | 2,06 | 0         | 0,005     | 0,047      | 6261        |

### Comments

19 gene sets were significant enrichment at FDR<0.005.

Among them, 14 were related to DNA synthesis and replication and cell cycle regulation: DNA strand elongation, Mitotic prometaphase, Extension of telomeres, E2F mediated regulation of DNA replication, Lagging strand synthesis, DNA replication, G2/M checkpoints, Activation of ATR in response to replication stress, Cell cycle mitotic, Mitotic M and M/G1 phases, Cyclin A/B1 associated events during G2/M transition, DNA repair, Global Genomic Non-Excision-Repair, Processive synthesis on the lagging strand.

3 gene sets were related to cell metabolism: Cholesterol Biosynthesis, Citric acid cycle, Fatty acid triacylglycerol and ketone body metabolism.

2 gene sets were related to extracellular matrix: Collagen formation, Extracellular matrix organization

Click on the gene set name to go to descriptions at the GSEA home page. Column description is provided in the page 2 of this document.

*Lysyl oxidase is downregulated by the EWS/FLI1 oncoprotein and its propeptide domain displays tumor suppressor activities in Ewing sarcoma cells. Agra N. et al.*

## Column descriptions

GENE SET: Gene set name. Click the gene set name for a detailed description of the gene set. For MSigDB gene sets, the description is the gene set page on the GSEA web site. For other gene sets, the description is provided by the author of the gene set.

SIZE: Number of genes in the gene set after filtering out those genes not in the expression dataset

ES: [Enrichment score for the gene set; that is, the degree to which this gene set is overrepresented at the top or bottom of the ranked list of genes in the expression dataset.](#)

NES: [Normalized enrichment score; that is, the enrichment score for the gene set after it has been normalized across analyzed gene sets.](#)

NOM p-value: [Nominal p value; that is, the statistical significance of the enrichment score. The nominal p value is not adjusted for gene set size or multiple hypothesis testing; therefore, it is of limited use in comparing gene sets.](#)

FDR q-value: [False discovery rate; that is, the estimated probability that the normalized enrichment score represents a false positive finding.](#)

FWER p-value: Familywise-error rate; that is, a more conservatively estimated probability that the normalized enrichment score represents a false positive finding. Because the goal of GSEA is to generate hypotheses, the GSEA team recommends focusing on the FDR statistic.

RANK AT MAX: The position in the ranked list at which the maximum enrichment score occurred. The more interesting gene sets achieve the maximum
